# Supplementary material for: The Effect of Temperature Cycling on the Magnetic Degradation and Microstructure of a Zn-Coated NdFeB Magnet
Source: MDPI journal article supplement (doi:10.3390/coatings12050660), 2022-05-12
Supplement: s1 [file s1]

## Supplementary Materials

# The Effect of Temperature Cycling on the Magnetic Degradation and Microstructure of a Zn-Coated NdFeB Magnet

Hu-Lin Wu <sup>1</sup>, Zhi-Mei Long <sup>2</sup>, Kai-Qiang Song <sup>1</sup>, Chao-Qun Li <sup>2</sup>, Da-Long Cong <sup>1</sup>, Bin Shao <sup>2,\*</sup>, Xiao-Wei Liu <sup>2</sup> and Yi-Long Ma <sup>2</sup>

<sup>1</sup> Southwest Institute of Technology and Engineering, Chongqing 400039, China; wuhulin59@163.com (H.-L.W.); scut\_song@163.com (K.-Q.S.); congdl09@163.com (D.-L.C.)

<sup>2</sup> School of Metallurgy and Material Engineering, ChongQing University of Science and Technology, ChongQing 401331, China; 2021202024@cqust.edu.cn (Z.-M.L.); 2020202022@cqust.edu.cn (C.-Q.L.); lxwicq@163.com (X.-W.L.); yilongma@163.com (Y.-L.M.)

\* Correspondence: shaobin19811107@163.com

**Table S1.** Temperature dependence of the  $\Phi$ ,  $B$  and their losses of the sample from R.T. to 300 °C.

| Temperature / °C | $\Phi$ / mWb | Loss of $\Phi$ / % | $B$ / mT | Loss of $B$ / % |
|------------------|--------------|--------------------|----------|-----------------|
| Original sample  | 20.38        | 0.00               | 191      | 0.00            |
| 80               | 20.15        | 1.08               | 191      | 0.21            |
| 120              | 20.10        | 1.33               | 190      | 0.73            |
| 150              | 20.06        | 1.52               | 188      | 1.78            |
| 180              | 19.57        | 3.93               | 155      | 19.02           |
| 220              | 9.37         | 54.00              | 60       | 68.65           |
| 250              | 3.88         | 80.95              | 23       | 87.98           |
| 300              | 0.21         | 98.97              | 1        | 99.48           |

**Table S2.** The  $\Phi$ ,  $B$  and their losses of samples were cycled different times in the range of R.T. — 180 °C and -50 °C — 180 °C, respectively.

| Temperature range | Cycle Number | $\Phi$ / mWb | Loss of $\Phi$ / % | $B$ / mT | Loss of $B$ / % |
|-------------------|--------------|--------------|--------------------|----------|-----------------|
| R.T.–180 °C       | 0            | 20.38        | 0.00               | 180      | 0.00            |
|                   | 10           | 14.71        | 27.39              | 102      | 43.11           |
|                   | 20           | 13.92        | 31.24              | 96       | 46.69           |
|                   | 40           | 13.61        | 32.77              | 95       | 47.48           |
|                   | 60           | 13.60        | 32.87              | 93       | 48.13           |
|                   | 80           | 13.59        | 32.87              | 92       | 48.69           |
|                   | 100          | 13.56        | 33.02              | 91       | 49.24           |
|                   | 125          | 13.42        | 33.71              | 91       | 49.44           |
| -50–180 °C        | 0            | 20.36        | 0.00               | 182      | 0.00            |
|                   | 10           | 14.72        | 27.24              | 103      | 43.78           |
|                   | 20           | 14.67        | 27.48              | 100      | 45.28           |
|                   | 40           | 14.24        | 29.61              | 96       | 47.42           |
|                   | 60           | 14.25        | 29.56              | 95       | 47.68           |
|                   | 80           | 14.01        | 30.75              | 94       | 48.26           |
|                   | 100          | 13.61        | 32.72              | 93       | 49.21           |
|                   | 125          | 13.50        | 33.27              | 92       | 49.73           |

**Table S3.** Values of fitting parameter and their standard errors (*S.E.*) in the range of R.T.—180 °C and -50—180 °C, respectively. The fitting formulae is given by  $Y = A \times (X - X_c)^P$ .

| Y              | Temperature Range | Fitting Parameter |              |       |            |      |            |       |
|----------------|-------------------|-------------------|--------------|-------|------------|------|------------|-------|
|                |                   | $X_c$             | $S.E. (X_c)$ | $A$   | $S.E. (A)$ | $P$  | $S.E. (P)$ | $R^2$ |
| Loss of $\Phi$ | R.T.—180 °C       | 0.00              | 18.47        | 24.37 | 5.28       | 0.07 | 0.05       | 0.99  |
|                | -50—180 °C        | 0.00              | 14.27        | 22.05 | 4.20       | 0.08 | 0.04       | 0.99  |
| Loss of $B$    | R.T.—180 °C       | 0.00              | 12.85        | 39.30 | 4.19       | 0.05 | 0.02       | 0.99  |
|                | -50—180 °C        | 0.00              | 6.80         | 39.21 | 2.21       | 0.05 | 0.01       | 0.99  |

**Table S4.** The  $\Phi$ ,  $B$  and their losses of the samples were cycled different times in the range of R.T. to 120, 140, and 160 °C, respectively.

| Temperature Range | Cycle Number | $\Phi$ / mWb | Loss of $\Phi$ /% | $B$ / mT | Loss of $B$ /% |
|-------------------|--------------|--------------|-------------------|----------|----------------|
| R.T.—120 °C       | 0            | 20.19        | 0.00              | 187      | 0.00           |
|                   | 10           | 20.04        | 0.76              | 183      | 1.88           |
|                   | 20           | 20.00        | 0.94              | 182      | 2.41           |
|                   | 40           | 19.95        | 1.21              | 180      | 3.49           |
|                   | 60           | 19.91        | 1.40              | 180      | 3.66           |
|                   | 80           | 19.90        | 1.45              | 179      | 4.20           |
|                   | 100          | 19.89        | 1.50              | 178      | 4.56           |
|                   | 125          | 19.87        | 1.58              | 177      | 5.02           |
| R.T.—140 °C       | 0            | 20.18        | 0.00              | 175      | 0.00           |
|                   | 10           | 19.98        | 0.97              | 171      | 2.10           |
|                   | 20           | 19.94        | 1.21              | 169      | 3.25           |
|                   | 40           | 19.90        | 1.37              | 161      | 8.02           |
|                   | 60           | 19.86        | 1.59              | 156      | 10.88          |
|                   | 80           | 19.84        | 1.67              | 154      | 12.02          |
|                   | 100          | 19.83        | 1.75              | 153      | 12.41          |
|                   | 125          | 19.82        | 1.78              | 150      | 14.12          |
| R.T.—160 °C       | 0            | 20.16        | 0.00              | 175      | 0.00           |
|                   | 10           | 16.31        | 19.13             | 105      | 39.70          |
|                   | 20           | 16.12        | 20.05             | 103      | 41.03          |
|                   | 40           | 15.99        | 20.68             | 100      | 42.56          |
|                   | 60           | 15.48        | 23.23             | 97       | 44.47          |
|                   | 80           | 15.37        | 23.75             | 96       | 44.85          |
|                   | 100          | 15.32        | 24.04             | 95       | 45.42          |
|                   | 125          | 15.30        | 24.10             | 94       | 46.18          |

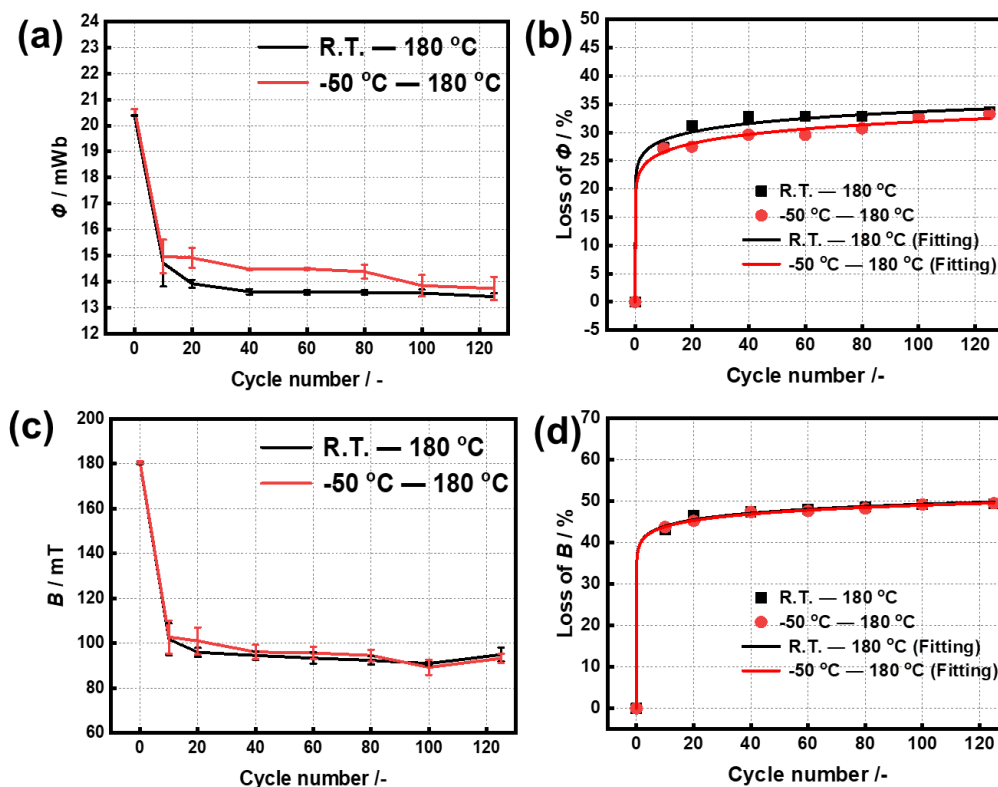

**Figure S1.** (a)  $\Phi$  and (b) its loss, (c)  $B$  and (d) its loss of the samples cycled in ranges of R.T. — 180 °C and -50 — 180 °C, respectively. The straight lines in (a) and (c) connect the data points. The lines in (b) and (d) are the fitting curves, and the fitting formula is given by  $Y = A \times (X - X_c)^p$ .

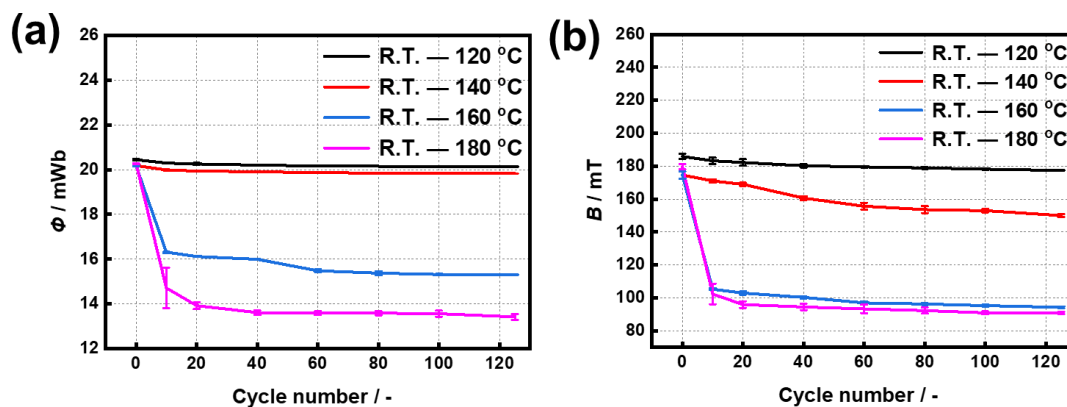

**Figure S2.** The (a)  $\Phi$  and (b)  $B$  of the samples cycled in ranges of R.T. to 120, 140, 160, and 180 °C, respectively.

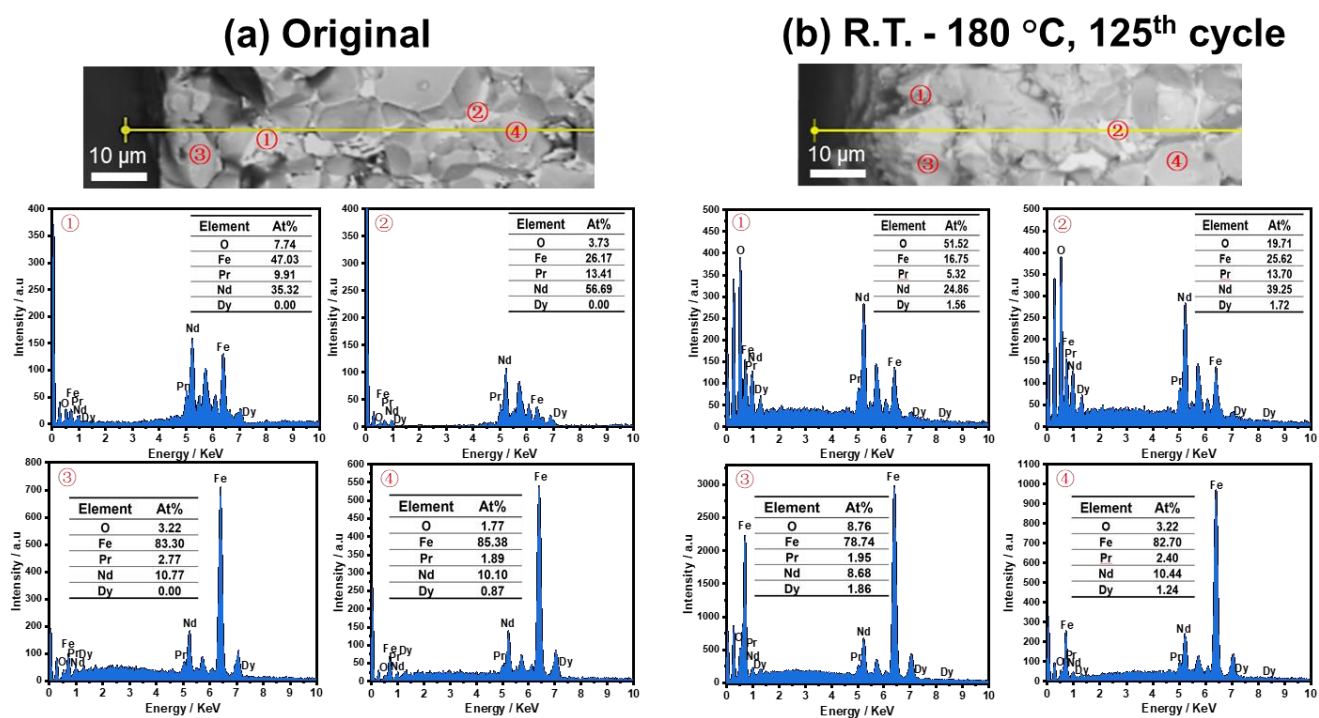

**Figure S3.** Cross-sectional backscattered SEM micrographs and EDS point elemental analysis from the surface to the inner of the different NdFeB magnets. (a) original sample; (b) sample after 125 cycles in range of R.T.–180 °C.
